# Supplementary material for: A reversible pH-modified fluorescence transition in block copolymer micelles enwrapped with a zinc(ii) fluorescent complex
Source: Royal Society of Chemistry journal article supplement (doi:10.1039/c6ra07049c), 2016-01-01
Supplement: c6ra07049c1.pdf [file c6ra07049c1.pdf]

## Supporting Information for

### Reversible pH-modified Fluorescence Transition in the Block Copolymer Micelles Enwrapping with Zinc(II) Fluorescent Complex

Yumei Qin,<sup>a</sup> Shuangde Li,<sup>\*b</sup> Jun Lu,<sup>\*a</sup> Zhen Li,<sup>a</sup> and Xue Duan<sup>a</sup>

<sup>a</sup> State Key Laboratory of Chemical Resource Engineering, Beijing University of Chemical Technology, Beijing 100029, P. R. China

<sup>b</sup> State Key Laboratory of Multi-phase Complex Systems, Institute of Process Engineering, Chinese Academy of Sciences, Beijing 100190, PR China.

#### LIST OF CONTENTS

**Scheme S1.** Process scheme of formation of PS-*b*-PAA@Zn(BTZ)<sub>2</sub> micelle and fabrication of (micelles/LDH)<sub>*n*</sub> films.

#### 1. Structure and Morphology characterization of Zn(BTZ)<sub>2</sub>@PS-*b*-PAA Micelles.

**Figure S1.** The photographs of Zn(BTZ)<sub>2</sub>@PS-*b*-PAA micelles at pH = 7.5 with Tyndall effect.

**Figure S2.** SEM-EDX analysis of Zn(BTZ)<sub>2</sub>@PS-*b*-PAA micelles at pH = 7.5.

**Figure S3.** TEM image of Zn(BTZ)<sub>2</sub>@PS-*b*-PAA micelles at pH = 7.5.

**Figure S4.** Tapping-mode AFM topographical 2D images of Zn(BTZ)<sub>2</sub>@PS-*b*-PAA micelles: a) pH = 7.5 and b) pH = 9.0.

**Figure S5.** Zeta-potential and dynamic lighting scattering (DLS) diameter as a function of pH value of Zn(BTZ)<sub>2</sub>@PS-*b*-PAA micelle: a, b, c) pH = 6.0, 7.5, 9.0, respectively.

#### 2. pH-induced Photophysical Properties of Micelles and (micelles/LDH)<sub>*n*</sub> Films.

**Figure S6.** PL emission spectra of Zn(BTZ)<sub>2</sub>@PS-*b*-PAA micelles at pH = 7.5 under 340 and 390 nm excitation.

**Figure S7.** PL emission spectra of Zn(BTZ)<sub>2</sub> DMF solution at pH = 5.0 and 9.0 under 340 and 390 nm excitation, respectively.

**Table S1.** The single or double-exponential fitting of fluorescence decay data of Zn(BTZ)<sub>2</sub> solution, micelles and films under pH = 6.0, 9.0 at 375 nm laser excitation.

**Figure S8.** Fluorescence decay profile for Zn(BTZ)<sub>2</sub> DMF solution, Zn(BTZ)<sub>2</sub>@PS-*b*-PAA micelles at pH 6.0 and 9.0, (Zn(BTZ)<sub>2</sub>@PS-*b*-PAA/LDH)<sub>16</sub> film at pH 9.0 and expose the film to HCl atmosphere for 2 min.

**Figure S9.** Polarized fluorescence profiles and anisotropic value for  $\text{Zn}(\text{BTZ})_2$  DMF solution.

**Figure S10.** (a) Reversibility transition from green to blue emission of  $\text{Zn}(\text{BTZ})_2@$ PS-*b*-PAA micelles repeated for 20 times; (b) the PL intensity of  $\text{Zn}(\text{BTZ})_2@$ PS-*b*-PAA micelles (stored at room temperature) recorded for 32 days.

**Figure S11.** PL emission spectra of  $\text{Zn}(\text{BTZ})_2@$ PS-*b*-PAA micelles at pH = 6.0 and 9.0 under 340 and 390 nm excitation, respectively, THF as solvent for PS-*b*-PAA.

**Figure S12.** Power X-ray diffraction patterns of  $\text{Zn}(\text{BTZ})_2$  molecules and after grinding.

**Figure S13.** CPTOSS  $^{13}\text{C}$  NMR spectra of  $\text{Zn}(\text{BTZ})_2$  molecules and after grinding.

**Figure S14.** SEM top view images of (micelles/LDH)<sub>*n*</sub> film with a) *n* = 4 and b) *n* = 12..

**Figure S15.** Absorption and PL emission spectra of (micelles/PDDA)<sub>*n*</sub> films.

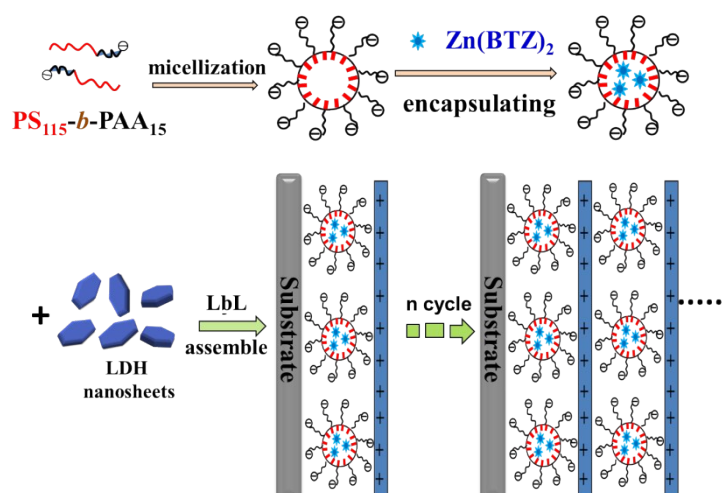

**Scheme S1.** Process scheme of formation of  $\text{PS-}b\text{-PAA}@$  $\text{Zn}(\text{BTZ})_2$  micelle and fabrication of (micelles/LDH)<sub>*n*</sub> films.

## 1. Structure and Morphology Characterization for Micelles and (micelles/LDH)<sub>*n*</sub> Films

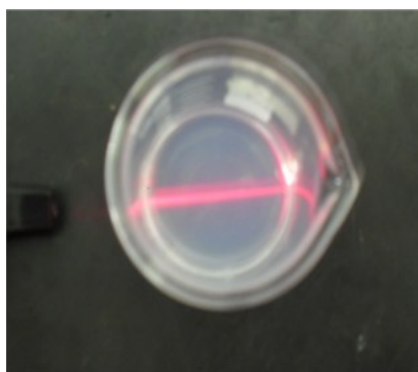

**Figure S1.** The photograph of  $\text{Zn}(\text{BTZ})_2@$ PS-*b*-PAA micelles at pH = 6.0 with Tyndall effect.

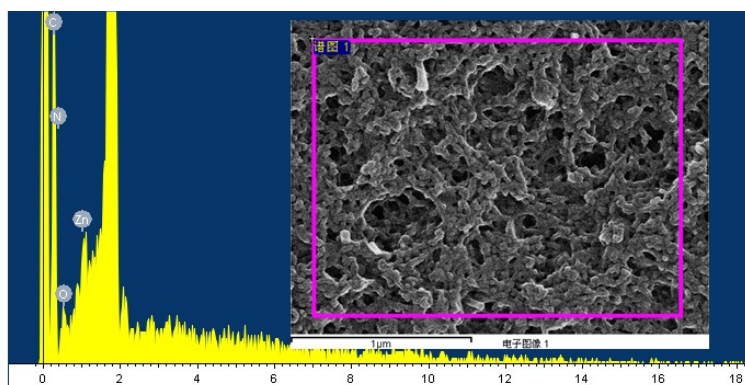

**Figure S2.** SEM-EDX analysis of  $\text{Zn}(\text{BTZ})_2@PS-b\text{-PAA}$  micelles at  $\text{pH} = 7.5$ .

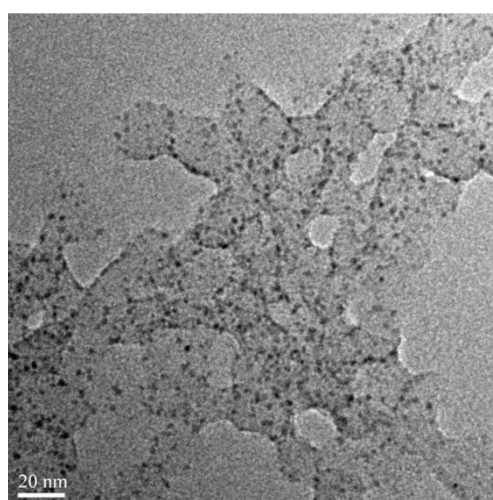

**Figure S3.** TEM image of  $\text{Zn}(\text{BTZ})_2@PS-b\text{-PAA}$  micelles at  $\text{pH} = 7.5$ .

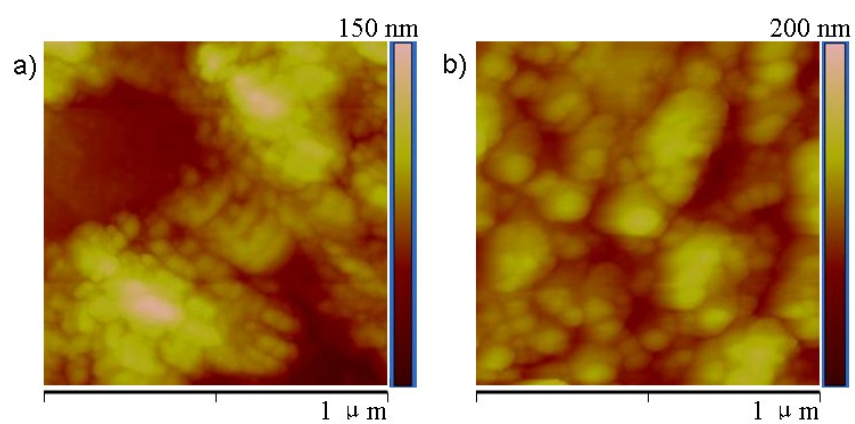

**Figure S4.** Tapping-mode AFM topographical 2D images of  $\text{Zn}(\text{BTZ})_2@PS-b\text{-PAA}$  micelles: a)  $\text{pH} = 7.5$  and b)  $\text{pH} = 9.0$ .

Atomic force microscope (AFM) images display that the individual micelle is spherical morphology and around 35 and 60 nm in diameter for pH = 7.5 and 9.0, respectively.

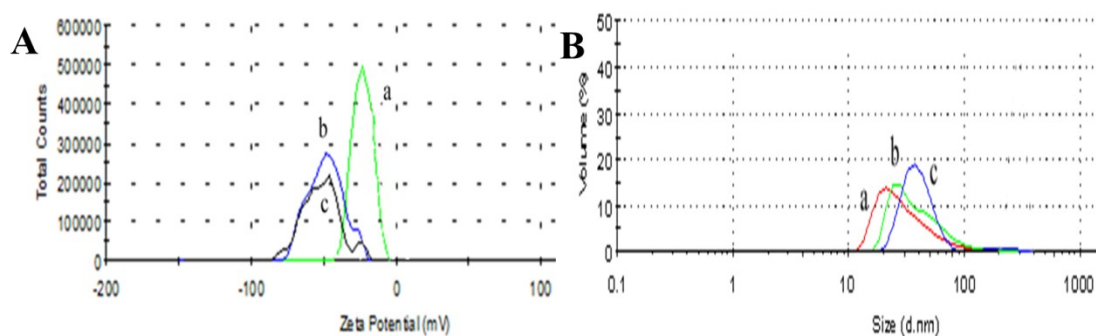

**Figure S5.** Zeta-potential and dynamic lighting scattering (DLS) diameter as a function of pH value of  $\text{Zn}(\text{BTZ})_2@PS\text{-}b\text{-PAA}$  micelle: a, b, c) pH = 6.0, 7.5, 9.0, respectively.

## 2. pH-induced Photophysical Properties of $\text{Zn}(\text{BTZ})_2@PS\text{-}b\text{-PAA}$ Micelles and (micelles/LDH)<sub>n</sub> Films

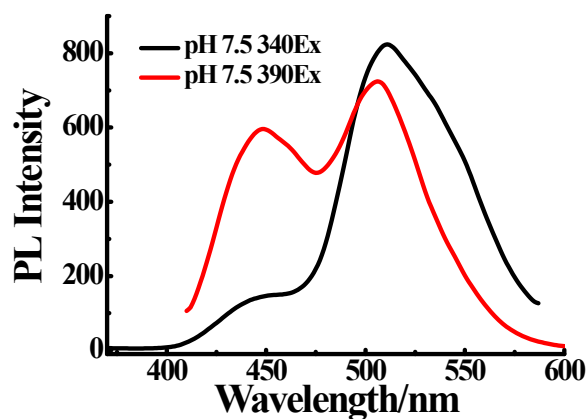

**Figure S6.** PL emission spectra of  $\text{Zn}(\text{BTZ})_2@PS\text{-}b\text{-PAA}$  micelles at pH = 7.5 under 340 and 390 nm excitation.

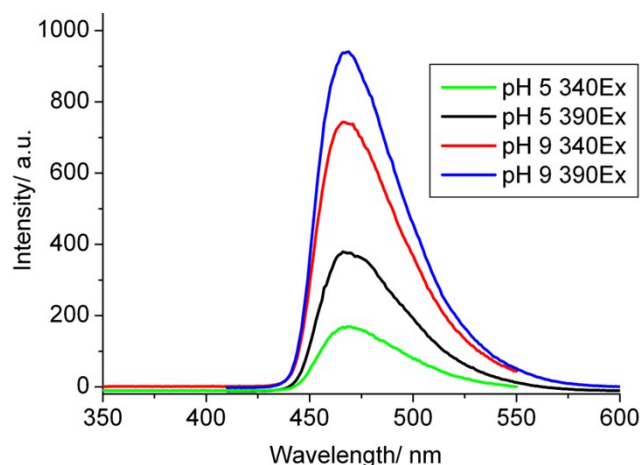

**Figure S7.** PL emission spectra of Zn(BTZ)<sub>2</sub> DMF solution at pH = 5.0 and 9.0 under 340 and 390 nm excitation, respectively.

**Table S1.** The single or double-exponential fitting of fluorescence decay data of Zn(BTZ)<sub>2</sub> solution, micelles and films under pH = 6.0, 9.0 at 375 nm laser excitation.

| Samples                                                                                   | $\tau_i$ (ns) <sup>[a]</sup> | $A_i$ (%) | $\langle\tau\rangle$ (ns) | $\chi^2$ <sup>[b]</sup> |
|-------------------------------------------------------------------------------------------|------------------------------|-----------|---------------------------|-------------------------|
| Zn(BTZ) <sub>2</sub> DMF solution at 460 nm                                               | 4.53                         | 100       | 4.53                      | 1.29                    |
| Zn(BTZ) <sub>2</sub> @PS- <i>b</i> -PAA micelles at 460 nm for pH = 9.0                   | 4.06                         | 100       | 4.06                      | 1.21                    |
| (Zn(BTZ) <sub>2</sub> @PS- <i>b</i> -PAA/LDH) <sub>16</sub> at 460 nm for pH = 9.0        | 2.06                         | 57.94     | 3.36                      | 1.09                    |
|                                                                                           | 5.16                         | 42.06     |                           |                         |
| Zn(BTZ) <sub>2</sub> @PS- <i>b</i> -PAA micelles at 510 nm for pH = 6.0                   | 0.69                         | 15.59     | 3.73                      | 1.20                    |
|                                                                                           | 4.29                         | 84.41     |                           |                         |
| (Zn(BTZ) <sub>2</sub> @PS- <i>b</i> -PAA/LDH) <sub>16</sub> at 510 nm after HCl treatment | 1.79                         | 51.24     | 2.95                      | 1.10                    |
|                                                                                           | 4.16                         | 48.76     |                           |                         |

[a]  $\tau_i$  ( $i = 1, 2$ ) is the fitted fluorescence lifetime.  $A_i$  is the percentage of  $\tau_i$ . In the biexponential case,  $\langle\tau\rangle = A_1\tau_1 + A_2\tau_2$ ;  $A_1 + A_2 = 1$ .

[b] the goodness of fit is indicated by the value of  $\chi^2$ .

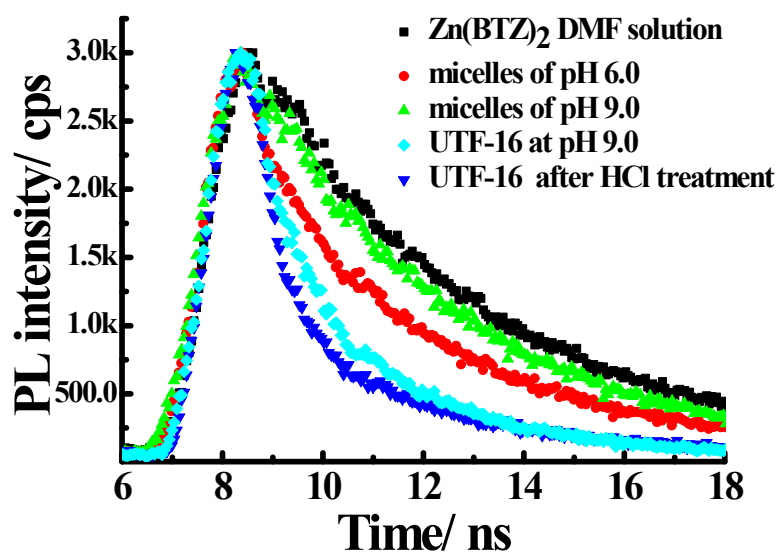

**Figure S8.** Fluorescence decay profile for Zn(BTZ)<sub>2</sub> DMF solution, Zn(BTZ)<sub>2</sub>@PS-*b*-PAA micelles at pH 6.0 and 9.0, (Zn(BTZ)<sub>2</sub>@PS-*b*-PAA/LDH)<sub>16</sub> film at pH 9.0 and the film exposed to HCl atmosphere for 2 mins.

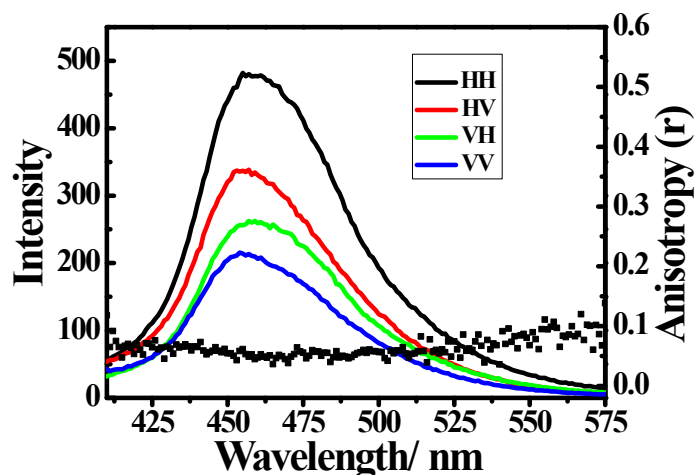

**Figure S9.** Polarized fluorescence profiles in the HH, HV, VV, VH modes and anisotropic value ( $r$ ) for Zn(BTZ)<sub>2</sub> DMF solution under 390nm excitation.

The anisotropic value  $r = (I_{VV} - GI_{VH}) / (I_{VV} + 2GI_{VH})$ , where  $G = I_{HV} / I_{HH}$ .  $I_{VH}$  donates the PL intensity obtained with vertical polarized excitation and horizontal polarized detection, and  $I_{VV}$ ,  $I_{HH}$ ,  $I_{HV}$  are defined similarly.

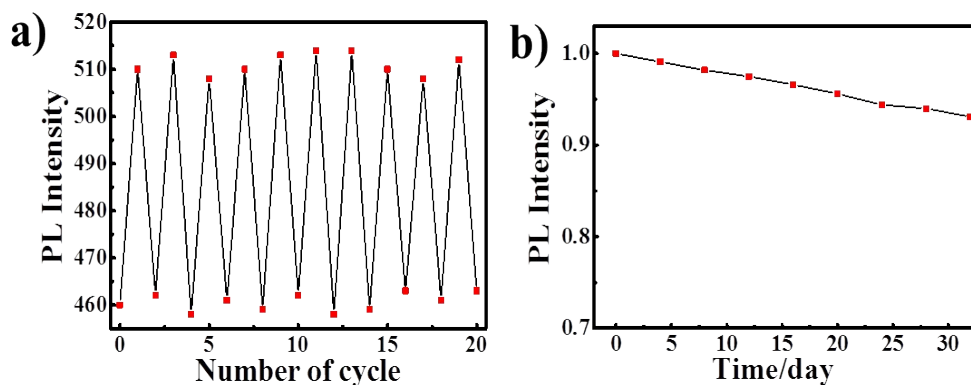

**Figure S10.** (a) Reversibility transition from green to blue emission of Zn(BTZ)<sub>2</sub>@PS-*b*-PAA micelles repeated for 20 times; (b) the PL intensity of Zn(BTZ)<sub>2</sub>@PS-*b*-PAA micelles (stored at room temperature) recorded for 32 days.

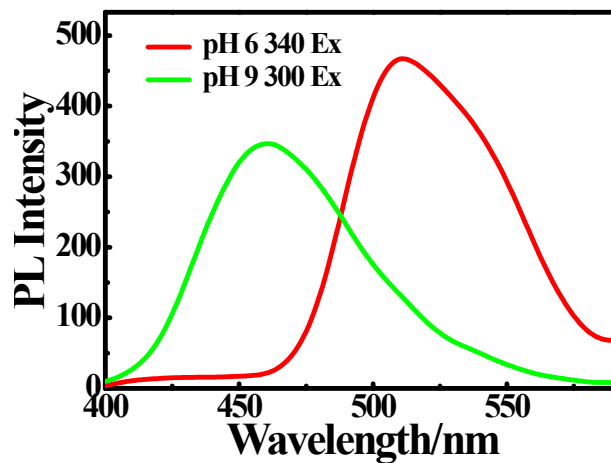

**Figure S11.** PL emission spectra of Zn(BTZ)<sub>2</sub>@PS-*b*-PAA micelles at pH = 6.0 and 9.0 under 340 and 390 nm excitation, respectively, THF as solvent for PS-*b*-PAA.

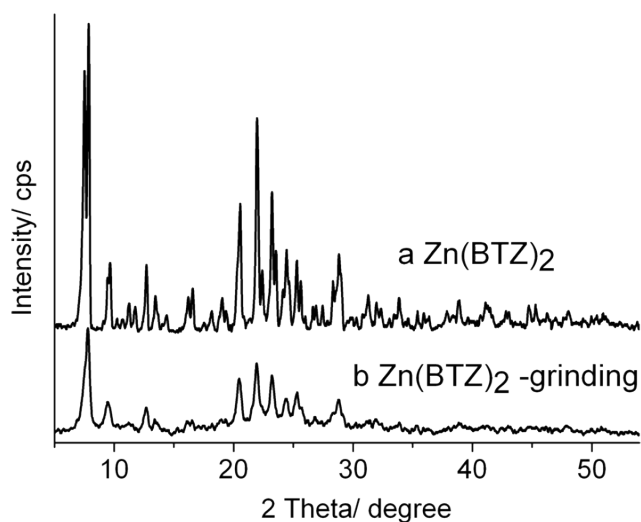

**Figure S12.** Power X-ray diffraction patterns of Zn(BTZ)<sub>2</sub> molecules and after grinding.

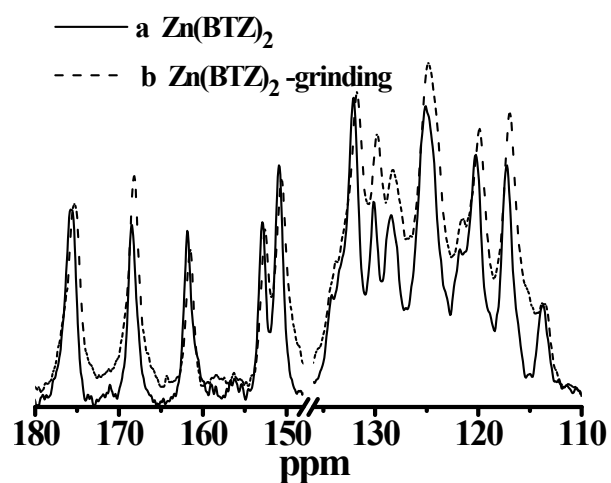

**Figure S13.** CPTOSS <sup>13</sup>C NMR spectra of Zn(BTZ)<sub>2</sub> molecules and after grinding.

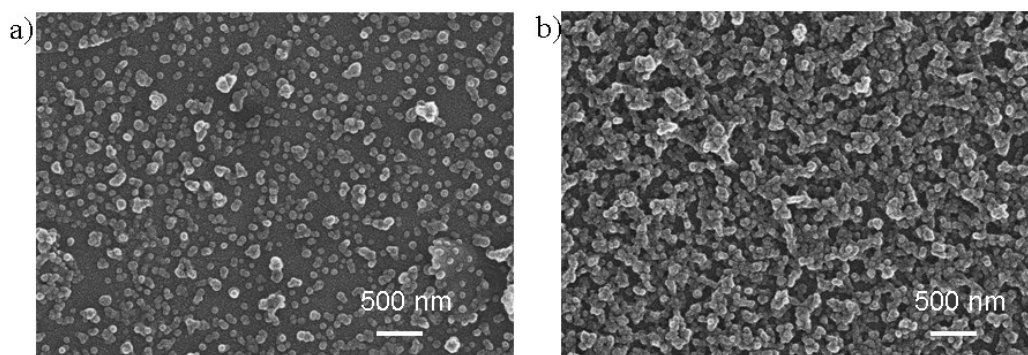

**Figure S14.** SEM top view images of (micelles/LDH)<sub>n</sub> film with a)  $n = 4$  and b)  $n = 12$ .

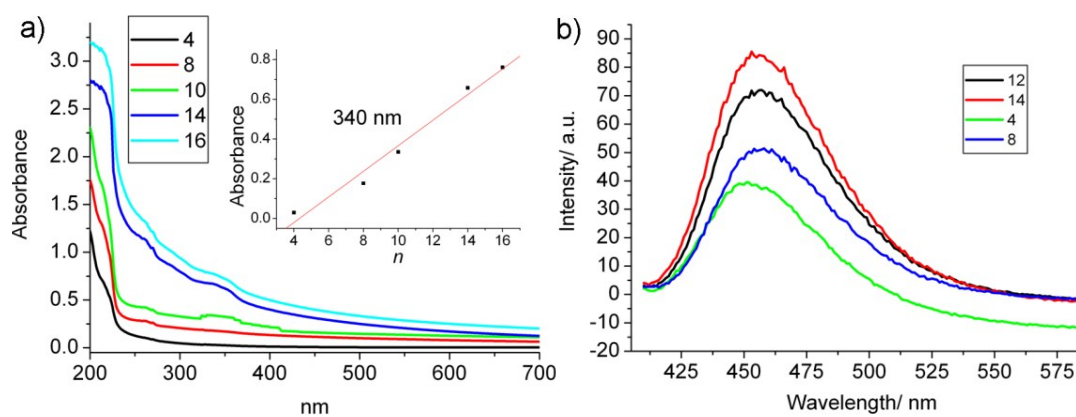

**Figure S15.** a) Absorption spectra of (micelles/PDDA)<sub>n</sub> films. The inset plots show the absorbance at 340 nm vs. the number of bilayers  $n$ . b) PL emission spectra of (micelles/PDDA)<sub>n</sub> films with variable bilayers under 390 nm excitation.
